# Supplementary material for: Host–guest chemistry of the (N,N′-diarylacetamidine)rhodium(iii) complex in zeolite Y
Source: Royal Society of Chemistry journal article supplement (doi:10.1039/b901762n), 2009-01-01
Supplement: b901762n.pdf [file b901762n.pdf]

Supplementary Information Presented with the Paper Entitled

## Host-Guest Chemistry of (N,N'-diarylacetamidine)rhodium(III) Complex in Zeolite Y

António M. Fonseca, Sara Gonçalves, Pier Parpot and Isabel C. Neves

<sup>a</sup>Departamento de Química, Centro de Química, Universidade do Minho, Campus de Gualtar, 4710-057 Braga, Portugal - E-mail: [amcf@quimica.uminho.pt](mailto:amcf@quimica.uminho.pt) and [ineves@quimica.uminho.pt](mailto:ineves@quimica.uminho.pt)

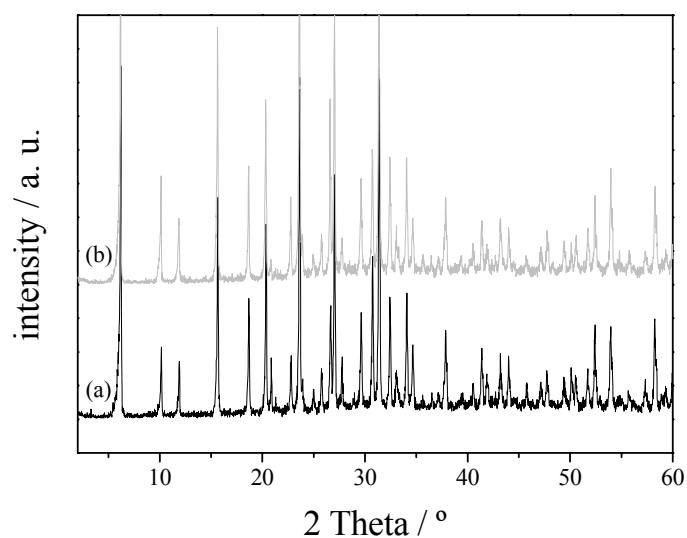

**Figure S1.** XRD powder patterns of NaY(a) and [RhL]-NaY (b).

XRD powder patterns of the NaY and host-guest material are presented in Figure S1. The powder XRD diffraction patterns were recorded at  $2\theta$  values between 5 and 60°. All samples exhibited the typical and similar pattern of highly crystalline zeolite Y. The XRD pattern of [RhL]-NaY presents over 70 % of crystallinity. It is clear that the XRD pattern of the modified sample is not severely affected by the introduction of the rhodium complex in the structure. However, the relative intensities of the [5 3 3], [6 4 2] and [5 5 5] reflections in the pattern of [RhL]-NaY sample has a small reduction when compared to NaY.
